## Endpoint Selection and Unreported Analgesic Use May Render Oncologic Studies Inconclusive

To the Editor:

We read with great interest the article by Gottschalk *et al.*<sup>1</sup> and wish to congratulate them for their great and remarkable work. They showed that, although the use of epidural analgesia for perioperative pain control during colorectal cancer surgery was not associated with a lower rate of cancer recurrence, a potential benefit was observed in older patients. Their results were in contrast with those of Christopherson *et al.*,<sup>2</sup> whose study population was similar, apart from sample size.

Nevertheless, the primary endpoints of these two studies were different. Gottschalk *et al.*<sup>1</sup> reported the incidence of cancer recurrence whereas Christopherson *et al.*<sup>2</sup> found a difference in terms of survival.

However, the definition of cancer recurrence used by Gottschalk *et al.*<sup>1</sup> would be of interest. The application of their findings may be limited as a result of this omission. Establishing a diagnosis for local recurrence can be particularly difficult in rectal cancer patients. It is for this reason that researchers<sup>3</sup> often consider reported rates of recurrence in this population to be of limited value. In this study, readers are uncertain about study methodology, potential bias, and the incidence of cancer-related death in both groups (epidural *vs.* nonepidural). Therefore, the results of Gottschalk *et al.*<sup>1</sup> might best be considered inconclusive.

Moreover, epidural analgesia is not the only intraoperative variable that could influence cancer outcomes. In the study by Gottschalk *et al.*,<sup>1</sup> the epidural group presented with more rectal cancer, higher histologic grade, more frequent radiotherapy and chemotherapy, and more blood loss, suggesting more difficult surgeries. All these characteristics are potential confounding factors that may impact the rate of cancer recurrence. Even if multivariate analysis has been well performed, these patients' characteristics increases the risk that the epidural group includes other unknown negative factors. In addition, Gottschalk *et al.*,<sup>1</sup> do not make available data concerning the number of nodes removed or the quality of the mesorectum—both indicators of surgery quality.

Finally, another potential bias in this study is the intraoperative use of nonsteroidal antiinflammatory drugs. The overexpression of cyclooxygenase type 2 and the possible immunoprotective effect of these drugs may have an impact on long-term cancer recurrence.<sup>4</sup> It would be of interest to know if the groups are balanced for the use of these medications. Indeed, the older patients are often more prone to not receive nonsteroidal anti-inflammatory drugs. And the effect

of the epidural analgesia might then have been unmasked for this reason. Following this hypothesis, in younger patients, these drugs may have masked the effect of epidural analgesia.

In conclusion, interpretation of the results reported by Gottschalk *et al.*<sup>1</sup> must wait until their methodology is further clarified.

**Patrice Forget, M.D.,\* Daniel Leonard, M.D., Alex Kartheuser, M.D., M.Sc., Ph.D., Marc De Kock, M.D., Ph.D.** \*Université catholique de Louvain, Steet-Luc University Hospital, Brussels, Belgium. forgetpatrice@yahoo.fr

### References

1. Gottschalk A, Ford JG, Regelin CC, You J, Mascha EJ, Sessler DI, Durieux ME, Nemergut EC: Association between epidural analgesia and cancer recurrence after colorectal cancer surgery. *ANESTHESIOLOGY* 2010; 113:27-34
2. Christopherson R, James KE, Tableman M, Marshall P, Johnson FE: Long-term survival after colon cancer surgery: A variation associated with choice of anesthesia. *Anesth Analg* 2008; 107:325-32
3. Dent OF, Chapuis PH, Bokey EL, Newland RC: Methodology and reporting in studies of local recurrence after curative excision of the rectum for cancer. *Br J Surg* 2001; 88:1476-80
4. Wang D, Dubois RN: The role of COX-2 in intestinal inflammation and colorectal cancer. *Oncogene* 2010; 29:781-8

(Accepted for publication October 27, 2010.)

## Epidural Analgesia and Cancer Recurrence: Timing Matters

To the Editor:

I read with great interest the recent publication in *ANESTHESIOLOGY* regarding the potential effect of epidural analgesia on cancer recurrence in patients undergoing colon surgery.<sup>1</sup> The study<sup>1</sup> reported that epidural analgesia showed no overall benefit—a finding that is in contrast to those of previous investigators.<sup>2,3</sup> However, Gottschalk *et al.*<sup>1</sup> report a limited beneficial effect in older patients as observed in *post hoc* analysis.

Is it possible that the results of the study by Gottschalk *et al.*<sup>1</sup> are different from those previously reported because their epidurals were not necessarily initiated before surgical incision? As a result of this methodologic preference, readers do not know whether these epidurals were functioning intraoperatively. This information is very important because, if the epidural was not used intraoperatively, suppression of the surgical stress response (and the resulting immunosuppression) may have not occurred in many of the patients in this study. In a similar study, Christopherson *et al.*<sup>2</sup> ensured that an analgesic level was attained before surgical incision—which may explain why an overall benefit was shown in that trial, but not in the current one.

Why patients older than 64 yr had some benefits remains uncertain. It could be a random statistical finding, as noted by the authors.<sup>1</sup> Alternatively, one can assume that these patients
